# Supplementary material for: Lifetime Prevalence and Risk Factors for Perinatal Depression in a Large Cohort of Women with Depression
Source: Research Square preprint supplement (doi:10.21203/rs.3.rs-362347/v2), 2021-11-12
Supplement: Supplementary file 1 [file 561ffb9880ebb98a55d91ab6.xlsx]

## Sheet: Table S1
Table S1. Selection process: for PND_priorDep and PND_firstDep samples
Process	Number
Completed online survey	20689
PriorDep cases: PND with history of major depression before first pregnancy (PND_priorDep)	2261
PriorDep comparison group: History of major depression before first pregnancy, but no PND (NPD_priorDep)	672
PNDfirst cases: PND is first onset of major depression (PND_firstDep)	878
Uncategorized PND cases: lost to further analysis	1919
PNDfirst comparison group: Met criteria for major depression but not associated with peripartum period (NPD_all)	2124

## Sheet: Table S2
Table S2. List of geographical regions for participants to apply to great great grandparents
England, Ireland, Scotland or Wales
Australia - not of Aboriginal or Torres Strait Islander descent
Australia - of Aboriginal or Torres Strait Islander descent
New Zealand - not of Maori descent
New Zealand - of Maori descent
Northern Europe including Sweden, Norway, Finland and surrounding countries
Western Europe including France, Germany, the Netherlands and surrounding countries
Southern Europe inclding Italy, Greece, Spain, Portugal and surrounding countries
Eastern Europe including Russia, Poland, Hungary and surrounding countries
Middle East including Lebanon, Turkey and surrounding countries
Eastern Asia including China, Japan, South Korea, Taiwan and surrounding countries
South-East Asia including Thailand, Malaysia, Indonesia, Singapore and surrounding countries
South Asia including India, Pakistan, Sri Lanka and surrounding countries
Polynesia, Micronesia or Melanesia including Tonga, Fiji, Papua New Guinea and surrounding countries
Africa
North America - not of First Nations, Native American, Inuit or Métis descent
North America - of First Nations, Native American, Inuit or Métis descent
Caribbean, Central or South America

## Sheet: Table S3
Table S3. List of psychiatric disorders with frequencies > 3% amongst all women with PND (N=5,058)
List of disorders	Number of cases (of all women with PND, N=5,058)	%
Bipolar Disorder	511	10.1
PMDD	195	3.8
Anorexia	178	3.5
ADHD	168	3.3
Anxiety Disorder	2680	53
Panic Attacks	516	10.2
Obsessive Compulsive Disorder	281	5.6
PTSD	859	17
Specific Phobia	635	12.6
Seasonal Affective Disorder	172	3.4
Social Anxiety Disorder	440	8.7
Personality Disorder	278	5.5

## Sheet: Table S4
Table S4. Length of worst episode of PND according to detailed onset information, and severity of worst episode of PND, characterised by interference in everyday life, and need for professional help, medication, or hospitalisation.
Length of worst episode	PND_priorDep (n=2,261)							PND_firstDep (n=878)
	Occurrence during pregnancy (n=734)			Occurrence after delivery (n=1,482)			Total	Occurrence during pregnancy (n=170)			Occurrence after delivery (n=692)			Total
	1st trimester (n=400)	2nd trimester (n=214)	3rd trimester (n=120)	0-4 weeks after delivery (n=724)	1-3 months after delivery (n=462)	More than 3 months after delivery (n=296)		1st trimester (n=73)	2nd trimester (n=55)	3rd trimester (n=42)	0-4 weeks after delivery (n=291)	1-3 months after delivery (n=225)	More than 3 months after delivery (n=176)
Up to 2 weeks	44 (0.11)	18 (0.8)	15 (0.13)	51 (0.07)	22 (0.05)	21 (0.07)	171	5 (0.07)	3 (0.06)	2 (0.05)	11 (0.04)	6 (0.03)	10 (0.06)	37
2-4 weeks	51 (0.13)	33 (0.15)	25 (0.21)	71 (0.10)	38 (0.08)	25 (0.08)	243	7 (0.10)	4 (0.07)	4 (0.10)	26 (0.09)	24 (0.11)	11 (0.06)	76
1-3 months	51 (0.13)	35 (0.16)	30 (0.25)	140 (0.19)	96 (0.21)	57 (0.19)	409	7 (0.10)	9 (0.16)	8 (0.19)	51 (0.18)	34 (0.15)	28 (0.16)	137
3-6 months	48 (0.12)	51 (0.24)	21 (0.18)	151 (0.21)	112 (0.24)	65 (0.22)	448	11 (0.15)	12 (0.22)	9 (0.21)	62 (0.21)	71 (0.32)	37 (0.21)	202
More than 6 months	206 (0.52)	76 (0.36)	29 (0.24)	308 (0.43)	188 (0.41)	128 (0.43)	935	43 (0.59)	27 (0.49)	19 (0.45)	139 (0.48)	89 (0.40)	90 (0.51)	407
Regression analysis: association of length of worst episode with early onset (either first trimester of pregnancy or within 4 weeks after delivery)
	PND_priorDep			PND_firstDep
	OR	CI	P	OR	CI	P
Up to 2 weeks	1.3	0.9-1.7	0.13	1	0.5-2.0	0.93
2-4 weeks	1	0.8-1.3	0.92	1.1	0.7-1.8	0.72
1-3 months	0.9	0.7-1.1	0.15	1	0.7-1.5	0.82
3-6 months	0.7	0.6-0.9	0.006	0.7	0.5-1.0	0.061
More than 6 months	1.4	1.2-1.6	0.00017	1.3	1.0-1.7	0.088
Severity of worst episode	PND_priorDep		PND_firstDep
	Occurrence during pregnancy (n=734)	Occurrence after delivery (n=1,482)	Occurrence during pregnancy (n=170)	Occurrence after delivery (n=692)
Interference	596 (0.80)	1232 (0.83)	141 (0.83)	559 (0.80)
Professional help	486 (0.66)	965 (0.65)	106 (0.62)	488 (0.70)
Medication	326 (0.44)	612 (0.41)	306 (0.43)	67 (0.36)
Hospitalisation	82 (0.11)	154 (0.10)	26 (0.15)	91 (0.13)
Note: proportions for severity measures do not add up to 1.0 since participants ticked all that applied.
Comparison of severity measures for PND_priorDep and PND_firstDep cases for occurrences in pregnancy or after delivery: Association of each measure with PND_firstDep status.
	OR (for PND_firstDep)	CI	P
Interference	0.9	0.8-1.1	0.5
Professional help	1.2	1.0-1.4	0.075
Medication	1	0.8-1.2	0.84
Hospitalisation	1.3	1.0-1.7	0.024
Comparison of postpartum onset of worst episode for PND_priorDep and PND_firstDep cases
	PND_priorDep	PND_firstDep
Onset of worst case is postpartum	1487 (0.66)	695 (0.79)
Regression analysis: association of postpartum onset of worst case with PND_firstDep case status
OR (PND_firstDep case status)	CI	P
2	1.7-2.4	4.6e-13

## Sheet: Table S5
Table S5. priorDep and firstDep samples: Number of respondents (cases and controls) for each variable.
Category	Variable	priorDep sample			firstDep sample
Possible confounders		Number respondents	Number cases/ controls	% cases/ controls	Number respondents	Number cases/ controls	% cases/ controls
	Age	2933			3002
	Number Births	2933			3002
Depression Severity
	Number Episodes	2911			2772
	Number symptoms	2853			2698
	Age of first depressive episode	2933			2791
Eductation
	Did not finish high school	2933	123/40	5.4/6.0	3002	74/209	8.4/9.8
	Post-secondary education	2933	1895/569	83.8/84.7	3002	699/1628	79.6/76.6
Ancestry
	At least one nonEuropean ancestor	2720	227/41	10.9/6.5	2779	63/137	8/6.9
	Australian Indigenous	2720	80/9	4.1/1.5	2779	15/45	2.0/2.4
Psychiatric comorbidities
	Bipolar Disorder	2933	274/64	12.1/9.5	3002	69/144	7.9/6.8
	PMDD	2933	112/19	5.0/2.8	3002	26/38	3.0/1.8
	Anorexia	2933	97/21	4.3/3.1	3002	16/46	1.8/2.2
	ADHD	2933	97/12	4.3/1.8	3002	16/35	1.8/1.6
	Anxiety disorder	2933	1272/323	56.3/48.1	3002	426/942	48.5/44.4
	Panic attacks	2933	201/64	8.9/9.5	3002	81/199	9.2/9.4
	OCD	2933	147/32	6.5/4.8	3002	31/68	3.5/3.2
	PTSD	2933	452/103	20/15.3	3002	107/277	12.2/13.0
	Specific phobia	2933	326/78	14.4/11.6	3002	69/199	7.9/9.4
	Seasonal Affective	2933	100/25	4.4/3.7	3002	17/55	1.9/2.6
	Social anxiety disorder	2933	239/46	10.6/6.8	3002	41/121	4.7/5.7
	Personality disorder	2933	153/38	6.8/5.7	3002	26/68	3.0/3.2
	anyComorbidity	2933	1675/451	74.1/67.1	3002	552/1274	62.9/60
Adverse experiences
	Emotional abuse	1956	959/275	64.7/58.0	1986	323/702	56.1/49.8
	Emotional neglect	1957	839/249	56.3/53.3	1956	281/654	49.5/47.1
	Physical Abuse (anytime)	2070	642/189	40.8/38.2	2085	195/459	32.1/31.1
	Childhood Physical Abuse	1100	374/107	44.3/41.8	877	96/228	36.6/37.1
	Physical neglect	2010	267/63	17.5/13.1	2038	72/171	12.1/11.9
	Sexual abuse (anytime)	2067	1004/284	63.2/56.9	2091	321/746	52.0/49.9
Reproductive
	Early pregnancy	2933	1143/313	50.6/46.6	2212	405/823	59.0/53.9
	Early menarche	1880	633/184	45/41.9	1843	208/509	38.6/39.8
	Disruptive NVP	2520	1031/257	53/44.9	1913	264/569	44.8/43.0
	Polycystic ovarian syndrome	1960	195/56	13.1/11.9	1987	55/135	9.1/9.6
	Endometriosis	1969	251/67	16.8/14.1	2000	100/195	16.3/13.8
	Gestational diabetes	2933	90/18	6.7/4.2	3002	21/48	4.0/3.7
Antidepressants
Effectiveness
	High efficacy	2790			2792	168/455	56.6/61.4
	Moderate efficacy	2790			2792	98/209	33.0/28.2
	Low efficacy	2790			2792	21/50	7.1/6.7
Side Effects
	Experienced at least one side effect	2832	1726/438	80/69.4	2882	561/1222	68.3/62.0
	Reduced sexual desire or function	2832	1062/240	49.2/38	2882	324/629	39.5/31.9
	Weight gain	2832	968/209	44.8/33.1	2882	317/631	38.6/32
	Dry mouth	2832	775/179	35.9/28.4	2882	247/513	30.1/26.0
	Nausea	2832	705/140	32.7/22.2	2882	192/346	23.4/17.6
	Dizzy	2832	651/129	30.2/20.4	2882	160/324	19.5/16.4
	Drowsy	2832	599/124	27.7/19.7	2882	188/325	22.9/16.5
	Difficulty Sleeping	2832	574/129	26.6/20.4	2882	162/350	19.7/17.8
	Sweating	2832	544/116	25.2/18.4	2882	162/300	19.7/15.2
	Headache	2832	544/93	25.2/14.7	2882	159/269	19.4/13.6
	Fatigue or Weakness	2832	506/102	23.4/16.2	2882	141/275	17.2/14.0
	Agitation	2832	450/91	20.8/14.4	2882	125/240	15.2/12.2
	Increased Anxiety	2832	444/90	20.6/14.3	2882	131/258	16.0/13.1
	Suicidal Thoughts	2832	399/86	18.5/13.6	2882	75/199	9.1/10.1
	Shaking	2832	389/80	18/12.7	2882	97/219	11.8/11.1
	Constipation	2832	262/54	12.1/8.6	2882	73/166	8.9/8.4
	Diarrhoea	2832	166/34	7.7/5.4	2882	54/103	6.6/5.2
	Blurred Vision	2832	180/39	8.3/6.2	2882	39/103	4.8/5.2
	Attempted Suicide	2832	166/29	7.7/4.6	2882	34/66	4.1/3.3
	Muscle Pain	2832	142/31	6.6/4.9	2882	40/90	4.9/4.6
	Vomiting	2832	127/19	5.9/3	2882	32/67	3.9/3.4
	Weight Loss	2832	97/19	4.5/3	2882	34/57	4.1/2.9
	Runny nose	2832	73/7	3.4/1.1	2882	13/29	1.6/1.5
	Rash	2832	55/6	2.5/1	2882	16/31	1.9/1.6

## Sheet: Table S6
Table S6. priorDep and firstDep samples: Results of comparison of cases and controls for all variables, including age and number of births as convariates.
	priorDep sample: 2261 cases; 672 controls; 2,933 total. Significant P in bold				firstDep sample: 878 cases; 2124 controls; 3002 total. Significant P in bold
Characteristic	OR	CI	P	P (Bonferroni Adjustment for multiple tests)	OR	CI	P	P (Bonferroni Adjustment for multiple tests)
Confounders
Age (OR per year, no covariates)	0.97	0.96-0.98	2.34364e-17	4.68728e-17	0.97	0.97-0.98	7.4445e-16	1.4889e-15
Number Births (OR per birth, no covariates)	1.289	1.17-1.43	4.67793e-07	9.35586e-07	1.27	1.17-1.38	3.52176e-09	7.04352e-09
Ancestry N(tests=2)
Ancestry: At least one non-European ancestor	1.5	1.1-2.1	0.028	0.056	1	0.7-1.4	0.857	1
Ancestry: Australian Indigenous	2.3	1.2-4.8	0.0236	0.0472	0.7	0.4-1.2	0.186	0.372
Depression severity, N(tests)=6
Odds of PND compared to NPD per symptom	1.2	1.1-1.3	0.00028	0.00168	1.1	0.98-1.1	0.186	0.558
More than 7 symptoms	1.5	1.2-1.8	0.00048	0.00288	1.2	0.97-1.4	0.0944	0.2832
Odds of PND compared to NPD per episode	1.1	1.1-1.1	1.9e-13	1.14e-12	1	1.0-1.0	0.403	1
Depression severity: More than 9 episodes	1.7	1.4-2.1	1.77e-08	1.062e-07	1	0.8-1.1	0.638	1
Odds of PND compared to NPD per year of age at first episode	0.97	0.96-0.99	0.00213	0.01278	1	0.99-1.0	0.734	1
Depression severity: Below average age at first episode	1.3	1.1-1.6	0.00392	0.02352	1	0.8-1.2	0.8	1
Education, N(tests)=3
Did not complete high school	0.95	0.7-1.4	0.809	1	1	0.7-1.3	0.883	1
Completed post-secondary education	0.9	0.7-1.2	0.654	1	1.1	0.9-1.4	0.313	1
Comorbidity, N(tests)=12
Having any comorbidity	1.2	1.0-1.5	0.0318		1.05	0.9-1.2	0.529
Bipolar Disorder	1.25197	0.9-1.7	0.132659	1	1.2	0.9-1.6	0.273801	1
PMDD	1.87467	1.2-3.2	0.0139046	0.1397	1.6	0.9-2.7	0.0758001	0.9096
Anorexia	1.34219	0.8-2.2	0.239043	1	0.8	0.4-1.4	0.395731	1
ADHD	2.26737	1.3-4.4	0.00905385	0.1143	1	0.5-1.9	0.939795	1
Anxiety Disorder	1.25855	1.1-1.5	0.0120034	0.1725	1.1	0.9-1.3	0.298233	1
Panic Attacks	1.01107	0.7-1.4	0.943472	1	1	0.8-1.3	0.909395	1
Obsessive Compulsive Disorder	1.25405	0.9-1.9	0.268445	1	1	0.6-1.5	0.916596	1
PTSD	1.29074	1-1.6	0.0362564	0.479	0.9	0.7-1.1	0.235972	1
Specific Phobia	1.2635	1-1.7	0.0892435	1	0.8	0.6-1.1	0.221052	1
Seasonal Affective Disorder	1.37852	0.9-2.2	0.168539	1	1	0.5-1.6	0.876449	1
Social Anxiety Disorder	1.51092	1.1-2.1	0.01577	0.2468	0.8	0.5-1.1	0.193176	1
Personality Disorder	1.03059	0.7-1.5	0.875058	1	0.7	0.4-1.1	0.118449	1
Trauma, N(tests)=7
ChildhoodEmotionalAbuse	1.36066	1.1-1.7	0.00551892	0.0373	1.3	1.1-1.6	0.010158	0.0711
ChildhoodEmotionalNeglect	1.27092	1-1.6	0.0310517	0.2618	1.1	0.9-1.4	0.180835	1
ChildhoodPhysicalAbuse	1.01093	0.8-1.4	0.941562	1	0.9	0.7-1.3	0.612957	1
Physical abuse (any time)	1.11731	0.9-1.4	0.307641	1	1	0.8-1.2	0.891778	1
Physical neglect (childhood)	1.42271	1.1-1.9	0.0232943	0.1988	1	0.7-1.3	0.991021	1
Sexual abuse (childhood)	0.957532	0.7-1.3	0.792783	1	0.8	0.6-1.1	0.20207	1
Sexual abuse (any time)	1.23593	1-1.5	0.0605055	0.4217	1.1	0.9-1.3	0.578835	1
Reproductive characteristics, N(tests)=6
Below average age at first pregnancy	1.1	1.0-1.4	0.13	0.78	1.3	1.1-1.6	0.00291	0.01746
Disruptive NVP	1.3	1.1-1.6	0.00658	0.03948	1	0.9-1.3	0.726	1
Early menarche	1.1	0.9-1.4	0.338	1	0.9	0.7-1.1	0.235	1
Endometrioses	1.2	0.9-1.6	0.213	1	1.3	1.0-1.7	0.0867	0.5202
Polycystic ovarian syndrome	0.9	0.7-1.3	0.724	1	0.8	0.6-1.1	0.243	1
Gestational diabetes	1.4	0.8-2.4	0.24	1	0.9	0.5-1.5	0.75	1
Antidepressant use
Tried 3 or more commonly prescribed antidepressant (as a proportion of women using antidepressants)	1.4	1.1-1.8	0.0014		1.3	1.0-1.6	0.00799
Antidepressant efficacy, N(tests)=3
High efficacy for any common antidepressant	0.7	0.5-0.8	0.00055	0.0022	0.8	0.6-1.1	0.15	0.6
Moderate efficacy for any common antidepressant	1.3	1.0-1.7	0.066	1	1.3	0.9-1.7	0.154	0.616
Low efficacy for any common antidepressant	1.2	0.9-1.6	0.25	1	1	0.6-1.7	0.95	1
Antidepressant side effects, N(tests)=23
Experienced at least one side effect	1.5	1.2-1.8	0.000298		1.1	0.9-1.4	0.189
Reduced sexual desire or function	1.4	1.1-1.7	0.000798255	0.0183599	1.3	1.1-1.5	0.0108526	0.249611
Weight gain	1.5	1.3-1.9	1.86554e-05	0.000429075	1.2	1-1.5	0.0244754	0.562935
Dry mouth	1.3	1.1-1.7	0.00484787	0.111501	1.2	1-1.4	0.125044	1
Nausea	1.4	1.1-1.7	0.00380929	0.0876136	1.3	1-1.5	0.0350668	0.806537
Dizzy	1.4	1.1-1.7	0.00575413	0.132345	1	0.8-1.3	0.921553	1
Drowsy	1.4	1.1-1.7	0.00746312	0.171652	1.4	1.1-1.7	0.00387714	0.0891743
Difficulty Sleeping	1.3	1-1.6	0.0374768	0.861967	1	0.8-1.3	0.861315	1
Sweating	1.3	1-1.7	0.0230654	0.530504	1.2	1-1.5	0.0852974	1
Headache	1.7	1.3-2.1	8.96009e-05	0.00206082	1.3	1-1.7	0.0177321	0.407837
Fatigue or Weakness	1.4	1.1-1.8	0.00357786	0.0822907	1.2	0.9-1.5	0.162572	1
Agitation	1.4	1.1-1.8	0.0163099	0.375127	1.2	0.9-1.5	0.251908	1
Increased Anxiety	1.4	1.1-1.8	0.0206163	0.474176	1.2	0.9-1.5	0.237303	1
Suicidal Thoughts	1.2	0.9-1.6	0.133831	1	0.7	0.5-1	0.0504593	1
Shaking	1.2	1-1.6	0.106715	1	0.9	0.7-1.2	0.550335	1
Constipation	1.5	1.1-2.1	0.0107767	0.247865	1	0.8-1.4	0.912014	1
Diarrhoea	1.2	0.8-1.9	0.277478	1	1.1	0.8-1.6	0.498737	1
Blurred Vision	1.3	0.9-2	0.121306	1	0.9	0.6-1.3	0.595204	1
Attempt Suicide	1.3	0.8-2	0.284071	1	1	0.6-1.5	0.961032	1
Muscle Pain	1.3	0.9-2	0.191431	1	1	0.7-1.5	0.988566	1
Vomiting	1.4	0.9-2.4	0.200803	1	1	0.6-1.6	0.948165	1
Weight Loss	1.2	0.7-2.1	0.440273	1	1.3	0.8-2	0.250137	1
Runny nose	3.4	1.6-8.2	0.00251014	0.0577331	1	0.5-2	0.908482	1
Rash	2.5	1.1-6.8	0.0356414	0.819753	1.1	0.6-2.1	0.732437	1

## Sheet: Table S7
Table S7. Comparison of NPD_priorDep with NPD_all groups, using regression analysis, for severity of major depression, using number of symptoms and episodes and age at first episode.
	OR	CI	P
Depression severity: odds of priorDep compared to odds of allDep per symptom	1.1	1.0-1.2	0.0098
Depression severity: odds of priorDep compared to odds of allDep per episode	1.1	1.1-1.1	3.3e-09
Depression severity: odds of priorDep compared to odds of allDep per year of age at first episode	0.68	0.64-0.71	1.3e-63

## Sheet: Table S8
Table S8. Sensitivity analysis of women experiencing PND both before and after delivery. Analysis conducted for both samples separately.
	PriorDep sample. Significant P in bold						firstDep sample. Significant P in bold
	Cases who experienced PND both during pregnancy and postpartum (1507 cases; 672 controls)						Cases who experienced PND both during pregnancy and postpartum (510 cases; 2124 controls)
Characteristic	Number of PND cases/ controls with this variable	PND cases/ controls with this variable as % of responses	OR	CI	P	P (Bonferroni Adjustment for multiple tests)	Number of PND cases/ controls with this variable	PND cases/ controls with this variable as % of responses	OR	CI	P	P (Bonferroni Adjustment for multiple tests)
Ancestry N(tests=2)
Ancestry: At least one non-European ancestor	166/41	12/6.5	1.6	1.1-2.3	0.0188	0.0376	40/137	8.7/6.9	1.1	0.7-1.6	0.613	1.226
Ancestry: Australian Indigenous	58/9	4.5/1.5	2.2	1.1-4.9	0.0318	0.0636	9/45	2.1/2.4	0.659	0.3-1.3	0.27	0.54
Depression severity, N(tests)=6
Odds of PND compared to NPD per symptom			1.3	1.2-1.4	8.62e-07	2.586e-06			1.1	1.0-1.2	0.0651	0.1953
More than 7 symptoms	1243/480	84.3/74.4	1.7	1.3-2.1	1.99e-05	5.97e-05	392/1340	78.4/72.8	1.3	1.0-1.6	0.0647	0.1941
Odds of PND compared to NPD per episode			1.1	1.1-1.1	1.22e-17	3.66e-17			1	1.0-1.0	0.13	0.39
Depression severity: More than 9 episodes	804/253	54.7/39.2	2.1	1.7-2.5	7.98e-13	2.394e-12	186/630	37.2/34.3	1.3	1.0-1.5	0.0417	0.1251
Odds of PND compared to NPD per year of age at first episode			0.96	0.94-0.98	2.17e-05	6.51e-05			1	0.99-1.0	0.327	0.981
Depression severity: Below average age at first episode	933/325	63/50.1	1.5	1.2-1.8	8.19e-05	0.0002457	312/1020	62.2/55.2	1.2	0.9-1.5	0.154	1
Education, N(tests)=2
Did not complete high school	85/40	5.6/6.0	1	0.6-1.5	0.989	1	51/209	10.0/9.8	1.17	0.8-1.6	0.348	1.044
Completed post-secondary education	1259/569	83.5/84.7	0.9	0.7-1.2	0.61	1.83	399/1628	78.2/76.6	1	0.8-1.3	0.903	1
Comorbidity, N(tests)=12
Likelihood of comorbidity	1152/451	76.4/67.1	1.3	1.1-1.7	0.00564		334/1274	65.5/60.0	1.17	0.9-1.4	0.151
Bipolar Disorder	196/64	13/9.5	1.4	1-1.9	0.0485206	0.5822	41/144	8.0/6.8	1.2	0.8-1.8	0.249449	1
PMDD	79/19	5.2/2.8	2	1.2-3.5	0.00807434	0.0969	19/38	3.7/1.8	2.1	1.1-3.7	0.0134233	0.1611
Anorexia	64/21	4.2/3.1	1.2	0.7-2.1	0.431809	1	10/46	2.0/2.2	0.9	0.4-1.7	0.66413	1
ADHD	70/12	4.6/1.8	2.4	1.3-4.7	0.00768681	0.0922	11/35	2.2/1.6	1.2	0.6-2.3	0.66338	1
Anxiety Disorder	888/323	58.9/48.1	1.4	1.1-1.7	0.0015898	0.0191	256/942	50.2/44.4	1.2	0.9-1.4	0.163203	1
Panic Attacks	151/64	10/9.5	1.2	0.9-1.6	0.318469	1	50/199	9.8/9.4	1.1	0.8-1.5	0.636223	1
Obsessive Compulsive Disorder	111/32	7.4/4.8	1.4	0.9-2.2	0.11111	1	19/68	3.7/3.2	1	0.6-1.7	0.911822	1
PTSD	336/103	22.3/15.3	1.5	1.1-1.9	0.00295284	0.0354	77/277	15.1/13	1.1	0.8-1.5	0.446717	1
Specific Phobia	242/78	16.1/11.6	1.4	1.1-1.9	0.0202314	0.2428	46/199	9.0/9.4	1	0.7-1.4	0.855848	1
Seasonal Affective Disorder	72/25	4.8/3.7	1.7	1.1-2.8	0.0332056	0.3985	9/55	1.8/2.6	0.9	0.4-1.8	0.799751	1
Social Anxiety Disorder	190/46	12.6/6.8	1.8	1.3-2.6	0.000791185	0.0095	26/121	5.1/5.7	0.8	0.5-1.3	0.451352	1
Personality Disorder	122/38	8.1/5.7	1.2	0.8-1.8	0.36022	1	21/68	4.1/3.2	0.9	0.5-1.5	0.742723	1
Trauma, N(tests)=7
ChildhoodEmotionalAbuse	657/275	68.2/58.0	1.6	1.3-2.1	4.79019e-05	0.0003	200/702	58.7/49.8	1.5	1.1-1.9	0.00272821	0.0191
ChildhoodEmotionalNeglect	585/249	60.3/53.3	1.6	1.2-2	0.000329457	0.0023	178/654	52.8/47.1	1.3	1-1.7	0.027571	0.193
ChildhoodPhysicalAbuse	264/107	46.4/41.8	1	0.8-1.4	0.796043	1	61/228	38.1/37.1	1	0.7-1.4	0.857477	1
Physical abuse (any time)	440/189	42.8/38.2	1.2	1-1.5	0.085869	0.6011	122/459	34.2/31.1	1.1	0.9-1.4	0.446568	1
Physical neglect (childhood)	203/63	20.4/13.1	1.8	1.3-2.4	0.000631593	0.0044	47/171	13.3/11.9	1.1	0.8-1.6	0.564986	1
Sexual abuse (childhood)	430/175	74.8/77.1	0.8	0.6-1.2	0.299532	1	118/449	73.8/75.8	0.8	0.5-1.2	0.300199	1
Sexual abuse (any time)	675/284	65.1/56.9	1.3	1-1.6	0.0247994	0.1736	202/746	55.6/49.9	1.2	1-1.5	0.102025	0.7142
Reproductive characteristics, N(tests)=7
Above average number of live births	428/138	28.4/20.5	1.9	1.6-2.5	1.43e-08	1.001e-07	201/578	39.4/27.2	2.1	1.7-2.6	1.85e-12	1.295e-11
Below average age at first pregnancy	822/313	54.5/46.6	1.3	1.1-1.6	0.00248	0.01736	248/823	62.6/53.9	1.6	1.3-2.0	0.00012	0.00084
Disruptive NVP	710/257	55.1/44.9	1.4	1.1-1.7	0.00172	0.01204	166/569	48.1/43.0	1.2	0.9-1.5	0.193	1
Early menarche	422/184	46/41.9	1.2	0.9-1.5	0.132	0.924	126/509	39.4/39.8	0.9	0.7-1.2	0.397	1
Endometrioses	173/67	17.7/14.1	1.3	0.9-1.8	0.13	0.91	60/195	16.8/13.8	1.3	0.9-1.8	0.0985	0.6895
Polycystic ovarian syndrome	135/56	13.9/11.9	1	0.7-1.4	0.83	5.81	135/34	9.7/9.6	0.8	0.5-1.3	0.428	1
Gestational diabetes	66/18	7.5/4.2	1.6	0.9-2.8	0.1	0.7	13/48	4.1/3.7	0.9	0.5-1.7	0.79	1
Antidepressant use
Have used common antidepressant	1442/631	95.7/93.9					475/1971	93.1/92.8
Tried 3 or more commonly prescribed antidepressant (as a proportion of women using antidepressants)	463/142	32.1/22.5	1.7	1.3-2.1	1.24e-05		98/363	20.6/18.4	1.2	1.0-1.5	0.108
Antidepressant efficacy, N(tests)=3
High efficacy for any common antidepressant	1444/631		0.7	0.49-0.85	0.0018	0.0054	475/1971		0.96	0.7-1.3	0.74	2.96
Moderate efficacy for any common antidepressant	1444/631		1.35	1.0-1.8	0.034	0.102	475/1971		1.1	0.8-1.4	0.51	1
Low efficacy for any common antidepressant	1444/631		1	0.7-1.5	0.88	1	475/1971		0.87	0.6-1.2	0.445	1
Antidepressant side effects, N(tests)=23
Experienced at least one side effect	1189/438	82.3/69.4	1.6	1.3-2.1	4.77e-05		334/1222	68.2/62.0	1.1	0.9-1.4	0.294
Reduced sexual desire or function	737/240	51.1/38	1.4	1.2-1.8	0.000674776	0.0155199	187/629	39.4/31.9	1.3	1-1.6	0.04748	1
Weight gain	690/209	47.9/33.1	1.7	1.4-2.1	1.34754e-06	3.09934e-05	180/631	37.9/32.0	1.2	1-1.5	0.113625	1
Dry mouth	565/179	39.2/28.4	1.5	1.2-1.9	0.000231395	0.00532208	135/513	28.4/26.0	1.1	0.8-1.4	0.525891	1
Nausea	518/140	35.9/22.2	1.5	1.2-1.9	0.000258709	0.00595031	116/346	24.4/17.6	1.3	1-1.7	0.02675	0.615251
Dizzy	486/129	33.7/20.4	1.5	1.2-2	0.000317708	0.00730727	100/324	21.1/16.4	1.1	0.8-1.4	0.45565	1
Drowsy	445/124	30.9/19.7	1.5	1.2-1.9	0.000901332	0.0207306	114/325	24.0/16.5	1.5	1.1-1.9	0.0041194	0.0947462
Difficulty Sleeping	421/129	29.2/20.4	1.4	1.1-1.8	0.00307513	0.0707279	91/350	19.2/17.8	1	0.7-1.3	0.75385	1
Sweating	394/116	27.3/18.4	1.4	1.1-1.8	0.00437502	0.100625	97/300	20.4/15.2	1.3	1-1.7	0.0566825	1
Headache	404/93	28/14.7	1.8	1.4-2.4	4.49848e-06	0.000103465	95/269	20.0/13.6	1.4	1.1-1.8	0.0177314	0.407823
Fatigue or Weakness	370/102	25.7/16.2	1.6	1.2-2.1	0.000304133	0.00699506	89/275	18.7/14	1.3	1-1.7	0.0516772	1
Agitation	340/91	23.6/14.4	1.6	1.2-2.1	0.00117639	0.0270571	82/240	17.3/12.2	1.4	1-1.8	0.0466573	1
Increased Anxiety	338/90	23.4/14.3	1.6	1.2-2.1	0.00148909	0.034249	79/258	16.6/13.1	1.3	0.9-1.7	0.11477	1
Suicidal Thoughts	312/86	21.6/13.6	1.4	1.1-1.9	0.010892	0.250516	44/199	9.3/10.1	0.7	0.5-1.1	0.119203	1
Shaking	306/80	21.2/12.7	1.5	1.1-2	0.00472649	0.108709	58/219	12.2/11.1	0.9	0.7-1.3	0.738873	1
Constipation	190/54	13.2/8.6	1.6	1.2-2.3	0.0047565	0.1094	43/166	9.1/8.4	1.1	0.7-1.5	0.736923	1
Diarrhoea	129/34	8.9/5.4	1.4	0.9-2.1	0.125003	1	31/103	6.5/5.2	1.2	0.7-1.8	0.514998	1
Blurred Vision	140/39	9.7/6.2	1.6	1.1-2.4	0.0160676	0.369554	33/103	6.9/5.2	1.4	0.9-2.2	0.103772	1
Attempt Suicide	143/29	9.9/4.6	1.7	1.1-2.6	0.0232635	0.53506	18/66	3.8/3.3	0.8	0.4-1.4	0.453625	1
Muscle Pain	110/31	7.6/4.9	1.6	1-2.4	0.0454232	1	26/90	5.7/4.6	1.1	0.7-1.8	0.578167	1
Vomiting	102/19	7.1/3	1.5	0.9-2.7	0.106285	1	19/67	4.0/3.4	1.1	0.6-1.8	0.839799	1
Weight Loss	68/19	4.7/3	1.2	0.7-2.1	0.540853	1	17/57	3.6/2.9	1.1	0.6-1.9	0.740293	1
Runny nose	58/7	4/1.1	4	1.9-9.9	0.000726976	0.0167205	8/29	1.7/1.5	1.1	0.4-2.3	0.854073	1
Rash	42/6	2.9/1	2.7	1.2-7.3	0.0295341	0.679285	7/31	1.5/1.6	0.9	0.4-2	0.805921	1
